# Supplementary material for: Sarcodon aspratus polysaccharides ameliorated obesity-induced metabolic disorders and modulated gut microbiota dysbiosis in mice fed a high-fat diet
Source: Royal Society of Chemistry journal article supplement (doi:10.1039/c9fo00963a), 2020-01-01
Supplement: c9fo00963a1.pdf [file c9fo00963a1.pdf]

**Supplementary tables**

Table S1. Primers used in this study

| <b>Primers</b> | <b>Forward primer</b>     | <b>Reverse primer</b>       |
|----------------|---------------------------|-----------------------------|
| ACC-1          | 5'-CTGCCATCCCATGTGCTAAT-  | 5'-AGCAGTCGTTCCCCTTCATT-3'  |
| PGC-1 $\alpha$ | 5'-CCCTGCCATTGTTAAGACC-3' | 5'-TGCTGCTGTTCCCTGTTTTTC-3' |
| $\beta$ -actin | 5'-AGGTGACAGCATTGCTTCTG-  | 5'-GCTGCCTCAACACCTCAAC-3'   |

## Supplementary figures

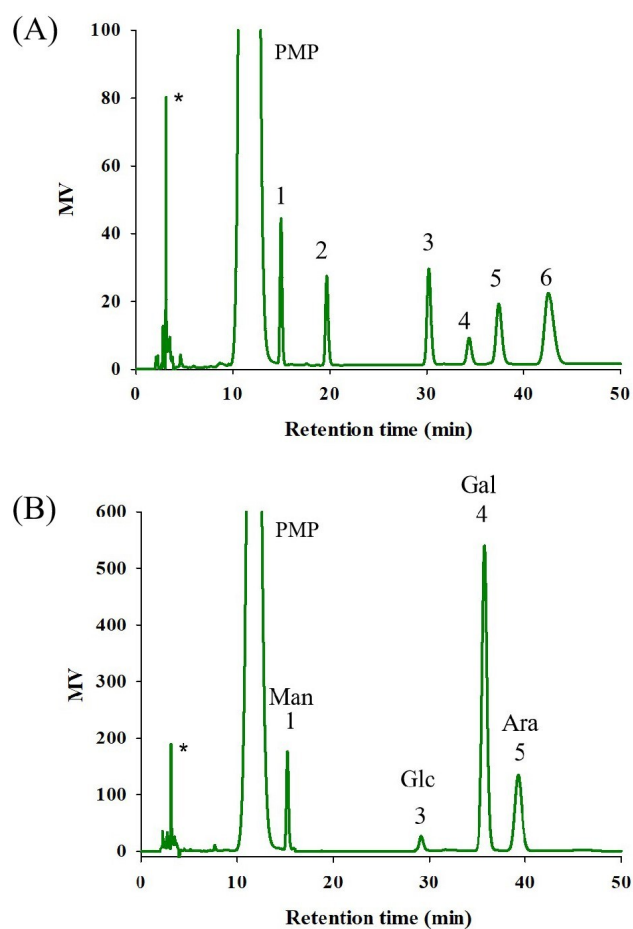

Fig.S1 Chemical characters of the SATP. (A) a standard mixture of monosaccharides; (B) analysis of monosaccharide composition of SATP (\*-solvent peak, 1-mannose, 2-rhamnose, 3-glucose, 4-galactose, 5-arabinose, and 6-fucose).

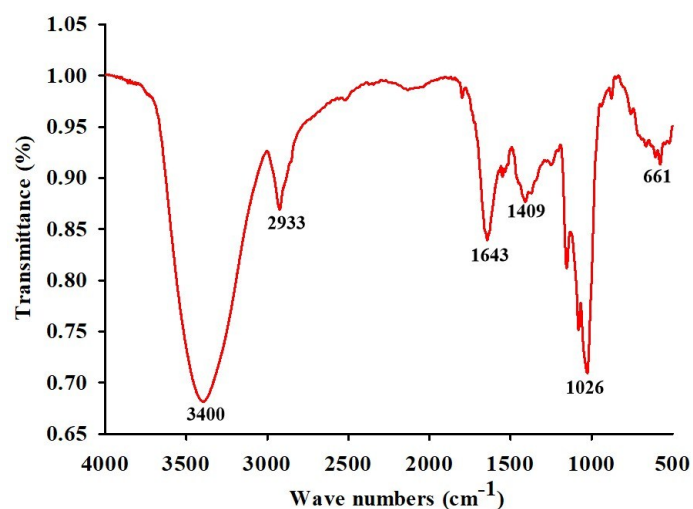

Fig.S2 FT-IR spectrum of SATP. (The absorbance band at 3,400  $\text{cm}^{-1}$  represented the stretching vibration of O-H in the constituent sugar residues. The adjacent peak at 2,933  $\text{cm}^{-1}$  was found for the stretching vibration of C-H in the sugar ring. The relatively strong absorption peak at 1,643  $\text{cm}^{-1}$  was caused by the bending vibration of C-O bonds in uronic acids. On the contrary, SAP had the absorption band centered at 1,409  $\text{cm}^{-1}$  due to the C-H. The absorbance of polysaccharides in the range 1,026-1,600  $\text{cm}^{-1}$  was characteristic of the C-O.)

(A)

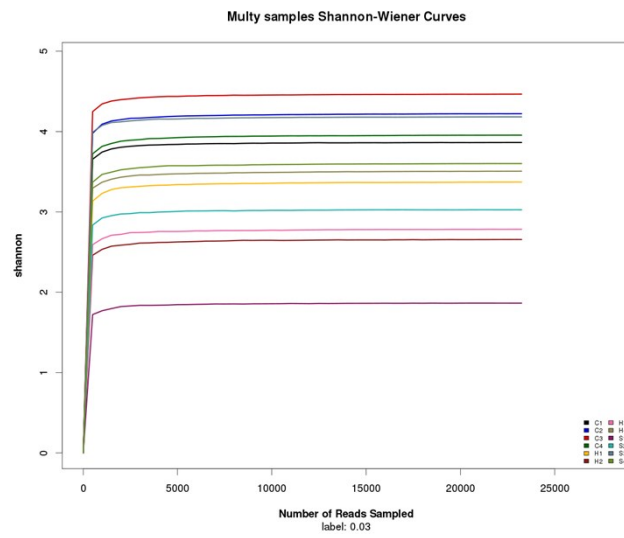

(B)

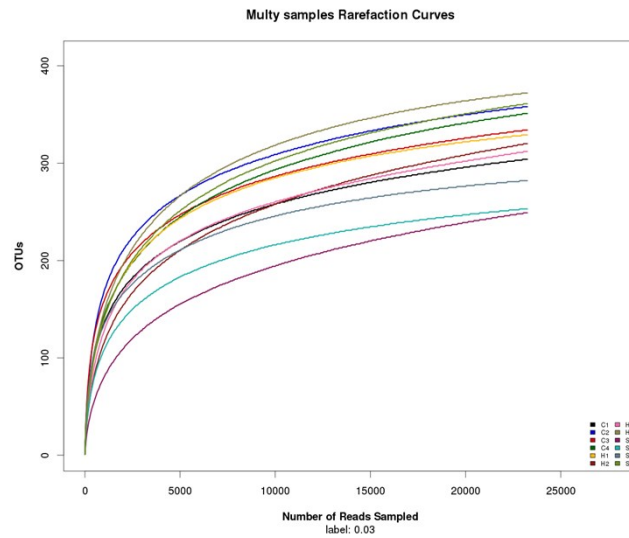

Fig.S3 Effect of SATP on the richness and diversity of caecal microbiota in HFD-fed mice (N=4). Control group, Chow-fed mice were treated daily with control saline; HFD group, HFD-fed mice were treated daily with control saline; SATP group, HFD-fed mice were treated daily with SATP ( $400 \text{ mg kg}^{-1}$ ) for 14 weeks by oral gavage. (A) Shannon-Wiener curves. (B) Rarefaction curves.
